# Supplementary material
Source: HighWire-hosted journal article supplement (https://bmjopenquality.bmj.com/content/12/2/e002084)
Supplement: inline-supplementary-material-1 [file inline-supplementary-material-1.pdf]

## Appendix 1

### Predetermined Data Entry Points (DEPs)

| Subheading                                                             | Data Entry Point (DEP)                                       |
|------------------------------------------------------------------------|--------------------------------------------------------------|
| Presenting Complaint<br>History of Presenting Complaint<br>Examination | Age                                                          |
|                                                                        | Gender                                                       |
|                                                                        | Date of injury                                               |
|                                                                        | Time of injury                                               |
|                                                                        | Type of injury                                               |
|                                                                        | Mechanism of injury                                          |
|                                                                        | Number of injuries                                           |
|                                                                        | Location of injuries                                         |
|                                                                        | Orientation (L/R)                                            |
|                                                                        | Haemodynamic status                                          |
|                                                                        | Neurovascular status                                         |
|                                                                        | CT scan (trauma series) mentioned/ordered                    |
|                                                                        | Primary survey                                               |
|                                                                        | Cervical spine status mentioned                              |
| Glasgow Coma Scale                                                     |                                                              |
| Past Medical History                                                   | Past medical history                                         |
|                                                                        | Past surgical history                                        |
| Drug History                                                           | Medications                                                  |
|                                                                        | Allergies                                                    |
|                                                                        | Tetanus status                                               |
| Social History                                                         | Smoking status                                               |
|                                                                        | Alcohol                                                      |
|                                                                        | Occupation                                                   |
|                                                                        | Living situation                                             |
|                                                                        | Hand dominance                                               |
|                                                                        | Mobility aids                                                |
|                                                                        | Next of kin                                                  |
| Plan                                                                   | Weight-bearing status                                        |
|                                                                        | Tetanus booster given?                                       |
|                                                                        | Antibiotics (if open fracture or wound only)                 |
|                                                                        | Swabs of injury site (if open fracture or wound only)        |
|                                                                        | Intravenous fluids                                           |
|                                                                        | Analgesia                                                    |
|                                                                        | Blood tests (ordered, mentioned)                             |
|                                                                        | Venous thromboembolism status or plan                        |
|                                                                        | Immediate management of injury e.g. cast                     |
|                                                                        | Long term management of injury e.g. theatre or senior review |
|                                                                        | Theatre scheduled                                            |
|                                                                        | Nil by mouth status                                          |
